# Supplementary material
Source: MDPI journal article supplement (https://www.mdpi.com/2073-4352/12/2/271)
Supplement: s1 [file s1]

# Synthesis, Crystal Structure, and Hirshfeld Surface Analysis of Hexachloroplatinate and Tetrachlorouranylate of 3-Carboxypyridinium. Halogen Bonds and $\pi$ -Interactions vs Hydrogen Bonds

Anton Petrovich Novikov \*, Mikhail Alexandrovich Volkov, Alexey Vladimirovich Safonov and Mikhail Semenovich Grigoriev

Frumkin Institute of Physical Chemistry and Electrochemistry, Russian Academy of Sciences, Leninskii prospect 31-4, 119071 Moscow, Russia; mendelev93@yandex.ru (M.A.V.); alexeysafonov@gmail.com (A.V.S.); mickgrig@mail.ru (M.S.G.)

\* Correspondence: tony.novickoff@yandex.ru

**Table S1.** Bond Lengths for I at 100 K.

| Atom            | Atom             | Length/Å  | Atom | Atom | Length/Å |
|-----------------|------------------|-----------|------|------|----------|
| Pt <sup>1</sup> | Cl1              | 2.3180(8) | N1   | C2   | 1.340(4) |
| Pt <sup>1</sup> | Cl1 <sup>1</sup> | 2.3180(8) | N1   | C6   | 1.337(4) |
| Pt <sup>1</sup> | Cl2 <sup>1</sup> | 2.3090(8) | C2   | C3   | 1.391(4) |
| Pt <sup>1</sup> | Cl2              | 2.3090(8) | C3   | C4   | 1.388(5) |
| Pt <sup>1</sup> | Cl3              | 2.3107(8) | C3   | C7   | 1.495(5) |
| Pt <sup>1</sup> | Cl3 <sup>1</sup> | 2.3107(8) | C4   | C5   | 1.384(5) |
| O <sup>1</sup>  | C7               | 1.236(4)  | C5   | C6   | 1.371(5) |
| O <sup>2</sup>  | C7               | 1.323(5)  |      |      |          |

<sup>1</sup>1-X, 1-Y, 1-Z

**Table S2.** Bond Angles for I at 100 K.

| Atom             | Atom | Atom             | Angle/°  | Atom             | Atom | Atom | Angle/°   |
|------------------|------|------------------|----------|------------------|------|------|-----------|
| Cl1              | Pt1  | Cl1 <sup>1</sup> | 180.0    | Cl3 <sup>1</sup> | Pt1  | Cl1  | 89.57(3)  |
| Cl2              | Pt1  | Cl1              | 89.06(3) | Cl3 <sup>1</sup> | Pt1  | Cl3  | 180.00(3) |
| Cl2              | Pt1  | Cl1 <sup>1</sup> | 90.94(3) | C6               | N1   | C2   | 122.6(3)  |
| Cl2 <sup>1</sup> | Pt1  | Cl1 <sup>1</sup> | 89.06(3) | N1               | C2   | C3   | 119.4(3)  |
| Cl2 <sup>1</sup> | Pt1  | Cl1              | 90.94(3) | C2               | C3   | C7   | 117.2(3)  |
| Cl2              | Pt1  | Cl2 <sup>1</sup> | 180.0    | C4               | C3   | C2   | 118.7(3)  |
| Cl2              | Pt1  | Cl3              | 90.89(3) | C4               | C3   | C7   | 124.1(3)  |
| Cl2              | Pt1  | Cl3 <sup>1</sup> | 89.11(3) | C5               | C4   | C3   | 120.1(3)  |
| Cl2 <sup>1</sup> | Pt1  | Cl3              | 89.11(3) | C6               | C5   | C4   | 119.0(3)  |
| Cl2 <sup>1</sup> | Pt1  | Cl3 <sup>1</sup> | 90.89(3) | N1               | C6   | C5   | 120.2(3)  |
| Cl3 <sup>1</sup> | Pt1  | Cl1 <sup>1</sup> | 90.43(3) | O1               | C7   | O2   | 124.0(3)  |
| Cl3              | Pt1  | Cl1 <sup>1</sup> | 89.57(3) | O1               | C7   | C3   | 119.8(3)  |
| Cl3              | Pt1  | Cl1              | 90.43(3) | O2               | C7   | C3   | 116.2(3)  |

<sup>1</sup>H-X, <sup>1</sup>H-Y, <sup>1</sup>H-Z

**Table S3.** Torsion Angles for **I** at 100 K.

| A  | B  | C  | D  | Angle/°   | A  | B  | C  | D  | Angle/°  |
|----|----|----|----|-----------|----|----|----|----|----------|
| N1 | C2 | C3 | C4 | 0.0(5)    | C3 | C4 | C5 | C6 | -0.9(5)  |
| N1 | C2 | C3 | C7 | -179.3(3) | C4 | C3 | C7 | O1 | 151.1(3) |
| C2 | N1 | C6 | C5 | 0.1(5)    | C4 | C3 | C7 | O2 | -28.8(5) |
| C2 | C3 | C4 | C5 | 0.6(5)    | C4 | C5 | C6 | N1 | 0.5(5)   |
| C2 | C3 | C7 | O1 | -29.8(5)  | C6 | N1 | C2 | C3 | -0.4(5)  |
| C2 | C3 | C7 | O2 | 150.4(3)  | C7 | C3 | C4 | C5 | 179.8(3) |

**Table S4.** Bond Lengths for **I** at 296 K.

| Atom | Atom             | Length/Å  | Atom | Atom | Length/Å |
|------|------------------|-----------|------|------|----------|
| Pt1  | Cl1 <sup>1</sup> | 2.3220(6) | N1   | C2   | 1.340(3) |
| Pt1  | Cl1              | 2.3220(6) | N1   | C6   | 1.335(3) |
| Pt1  | Cl2              | 2.3144(5) | C2   | C3   | 1.375(3) |
| Pt1  | Cl2 <sup>1</sup> | 2.3145(5) | C3   | C4   | 1.392(3) |
| Pt1  | Cl3              | 2.3139(5) | C3   | C7   | 1.496(3) |
| Pt1  | Cl3 <sup>1</sup> | 2.3139(5) | C4   | C5   | 1.375(4) |
| O1   | C7               | 1.231(3)  | C5   | C6   | 1.365(4) |
| O2   | C7               | 1.317(4)  |      |      |          |

<sup>1</sup>H-X, <sup>1</sup>H-Y, <sup>1</sup>H-Z

**Table S5.** Bond Angles for **I** at 296 K.

| Atom             | Atom | Atom             | Angle/°  | Atom | Atom | Atom             | Angle/°  |
|------------------|------|------------------|----------|------|------|------------------|----------|
| Cl1 <sup>1</sup> | Pt1  | Cl1              | 180.0    | Cl3  | Pt1  | Cl2 <sup>1</sup> | 89.18(2) |
| Cl2 <sup>1</sup> | Pt1  | Cl1              | 90.87(2) | Cl3  | Pt1  | Cl3 <sup>1</sup> | 180.0    |
| Cl2              | Pt1  | Cl1 <sup>1</sup> | 90.86(2) | C6   | N1   | C2               | 122.5(2) |
| Cl2              | Pt1  | Cl1              | 89.14(2) | N1   | C2   | C3               | 120.3(2) |
| Cl2 <sup>1</sup> | Pt1  | Cl1 <sup>1</sup> | 89.14(2) | C2   | C3   | C4               | 117.7(2) |
| Cl2              | Pt1  | Cl2 <sup>1</sup> | 180.0    | C2   | C3   | C7               | 118.2(2) |
| Cl3 <sup>1</sup> | Pt1  | Cl1 <sup>1</sup> | 90.49(2) | C4   | C3   | C7               | 124.1(2) |
| Cl3              | Pt1  | Cl1              | 90.49(2) | C5   | C4   | C3               | 120.5(2) |
| Cl3              | Pt1  | Cl1 <sup>1</sup> | 89.51(2) | C6   | C5   | C4               | 119.4(3) |
| Cl3 <sup>1</sup> | Pt1  | Cl1              | 89.51(2) | N1   | C6   | C5               | 119.6(3) |
| Cl3 <sup>1</sup> | Pt1  | Cl2 <sup>1</sup> | 90.82(2) | O1   | C7   | O2               | 124.0(2) |
| Cl3 <sup>1</sup> | Pt1  | Cl2              | 89.18(2) | O1   | C7   | C3               | 119.5(2) |
| Cl3              | Pt1  | Cl2              | 90.81(2) | O2   | C7   | C3               | 116.5(2) |

<sup>1</sup>H-X,<sup>1</sup>H-Y,<sup>1</sup>H-Z

**Table S6.** Hydrogen Bonds for **I** at 296 K.

| D  | H   | A                | d(D-H)/Å | d(H-A)/Å | d(D-A)/Å | D-H-A/° |
|----|-----|------------------|----------|----------|----------|---------|
| O2 | H2B | Cl1 <sup>1</sup> | 0.86(2)  | 2.71(3)  | 3.531(3) | 161(8)  |
| O2 | H2B | Cl3 <sup>1</sup> | 0.86(2)  | 2.86(7)  | 3.434(3) | 126(7)  |
| O2 | H2C | Cl3 <sup>2</sup> | 0.87(2)  | 2.66(4)  | 3.451(3) | 152(6)  |
| N1 | H1A | O1 <sup>3</sup>  | 0.86     | 1.93     | 2.762(3) | 162.3   |

$$^1\text{-X}, ^1\text{-Y}, ^2\text{-Z}; ^2\text{-1/2+X}, ^1\text{/2-Y}, ^1\text{/2+Z}; ^3\text{-1/2+X}, ^3\text{/2-Y}, ^{-1/2+Z}$$

**Table S7.** Torsion Angles for **I** at 296 K.

| Table 7 Torsion Angles for NicPt_RT. |    |    |    |           |    |    |    |    |          |
|--------------------------------------|----|----|----|-----------|----|----|----|----|----------|
| A                                    | B  | C  | D  | Angle/°   | A  | B  | C  | D  | Angle/°  |
| N1                                   | C2 | C3 | C4 | 0.3(4)    | C3 | C4 | C5 | C6 | -1.1(4)  |
| N1                                   | C2 | C3 | C7 | -178.9(2) | C4 | C3 | C7 | O1 | 151.5(2) |
| C2                                   | N1 | C6 | C5 | 0.2(4)    | C4 | C3 | C7 | O2 | -28.2(4) |
| C2                                   | C3 | C4 | C5 | 0.6(4)    | C4 | C5 | C6 | N1 | 0.7(4)   |
| C2                                   | C3 | C7 | O1 | -29.4(4)  | C6 | N1 | C2 | C3 | -0.7(4)  |
| C2                                   | C3 | C7 | O2 | 151.0(3)  | C7 | C3 | C4 | C5 | 179.7(3) |

**Table S8.** Bond Lengths for **II** at 100 K.

| Atom | Atom             | Length/Å  | Atom | Atom | Length/Å |
|------|------------------|-----------|------|------|----------|
| U1   | Cl1 <sup>1</sup> | 2.6461(8) | N1   | C2   | 1.341(4) |
| U1   | Cl1              | 2.6461(8) | N1   | C6   | 1.342(4) |
| U1   | Cl2              | 2.6694(7) | C2   | C3   | 1.383(4) |
| U1   | Cl2 <sup>1</sup> | 2.6694(7) | C3   | C4   | 1.394(4) |
| U1   | O1 <sup>1</sup>  | 1.780(2)  | C3   | C7   | 1.512(4) |
| U1   | O1               | 1.780(2)  | C4   | C5   | 1.389(4) |
| O2   | C7               | 1.235(4)  | C5   | C6   | 1.378(4) |
| O3   | C7               | 1.334(4)  |      |      |          |

$$^1\text{-X}, ^1\text{-Y}, ^{-}\text{Z}$$

**Table S9.** Bond Angles for **II** at 100 K.

| Table 5 Bond Angles for U9. |      |                  |             |                 |      |                 |          |
|-----------------------------|------|------------------|-------------|-----------------|------|-----------------|----------|
| Atom                        | Atom | Atom             | Angle/°     | Atom            | Atom | Atom            | Angle/°  |
| Cl1 <sup>1</sup>            | U1   | Cl1              | 180.0       | O1 <sup>1</sup> | U1   | Cl2             | 90.14(8) |
| Cl1                         | U1   | Cl2              | 89.47(2)    | O1              | U1   | O1 <sup>1</sup> | 180.0    |
| Cl1                         | U1   | Cl2 <sup>1</sup> | 90.53(2)    | C2              | N1   | C6              | 123.3(3) |
| Cl1 <sup>1</sup>            | U1   | Cl2              | 90.53(2)    | N1              | C2   | C3              | 119.2(3) |
| Cl1 <sup>1</sup>            | U1   | Cl2 <sup>1</sup> | 89.47(2)    | C2              | C3   | C4              | 118.9(3) |
| Cl2 <sup>1</sup>            | U1   | Cl2              | 180.000(17) | C2              | C3   | C7              | 122.9(3) |
| O1                          | U1   | Cl1              | 89.81(8)    | C4              | C3   | C7              | 118.2(3) |
| O1                          | U1   | Cl1 <sup>1</sup> | 90.19(8)    | C5              | C4   | C3              | 120.1(3) |
| O1 <sup>1</sup>             | U1   | Cl1 <sup>1</sup> | 89.81(8)    | C6              | C5   | C4              | 118.8(3) |
| O1 <sup>1</sup>             | U1   | Cl1              | 90.19(8)    | N1              | C6   | C5              | 119.6(3) |
| O1 <sup>1</sup>             | U1   | Cl2 <sup>1</sup> | 89.86(8)    | O2              | C7   | O3              | 124.4(3) |
| O1                          | U1   | Cl2              | 89.86(8)    | O2              | C7   | C3              | 118.4(3) |

|    |    |                  |          |    |    |    |          |
|----|----|------------------|----------|----|----|----|----------|
| O1 | U1 | Cl2 <sup>1</sup> | 90.14(8) | O3 | C7 | C3 | 117.2(3) |
|----|----|------------------|----------|----|----|----|----------|

<sup>1</sup>1-X,1-Y,-Z

**Table S10.** Torsion Angles for **II** at 100 K.

| A  | B  | C  | D  | Angle/°   | A  | B  | C  | D  | Angle/°   |
|----|----|----|----|-----------|----|----|----|----|-----------|
| N1 | C2 | C3 | C4 | 1.8(4)    | C3 | C4 | C5 | C6 | 0.4(5)    |
| N1 | C2 | C3 | C7 | -178.1(3) | C4 | C3 | C7 | O2 | 15.5(4)   |
| C2 | N1 | C6 | C5 | -1.6(5)   | C4 | C3 | C7 | O3 | -162.5(3) |
| C2 | C3 | C4 | C5 | -2.0(5)   | C4 | C5 | C6 | N1 | 1.4(5)    |
| C2 | C3 | C7 | O2 | -164.6(3) | C6 | N1 | C2 | C3 | 0.0(5)    |
| C2 | C3 | C7 | O3 | 17.4(4)   | C7 | C3 | C4 | C5 | 177.9(3)  |

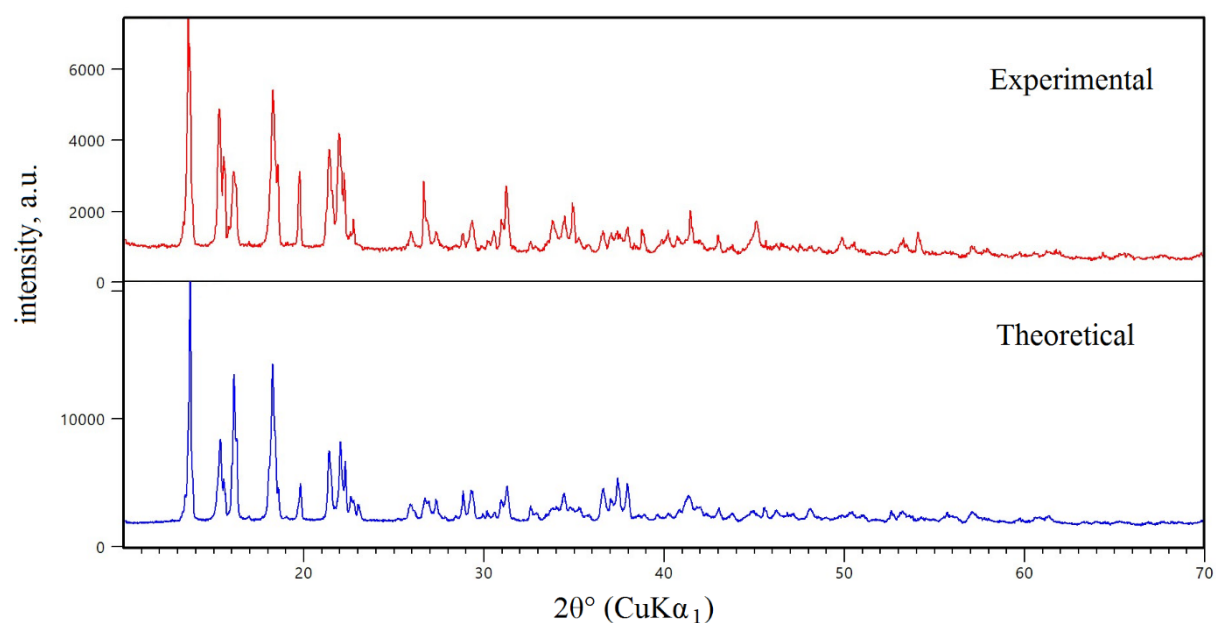

**Figure S1.** Experimental and theoretical powder XRD spectra of **I** at 296 K.

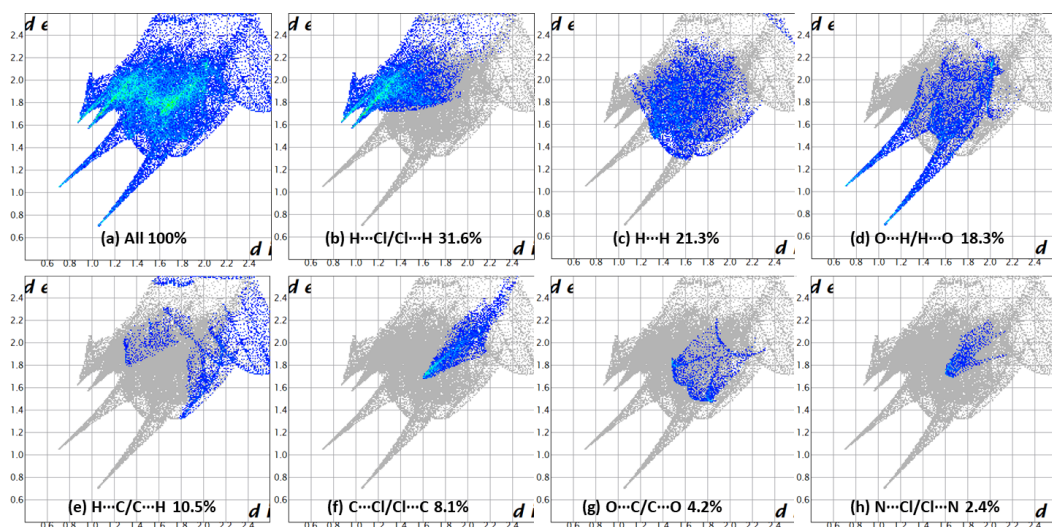

**Figure S2.** The 2D fingerprint plots of interatomic interactions for cation in **I** at 100 K show the percentages of contacts contributed to the total Hirshfeld surface area of the molecules.

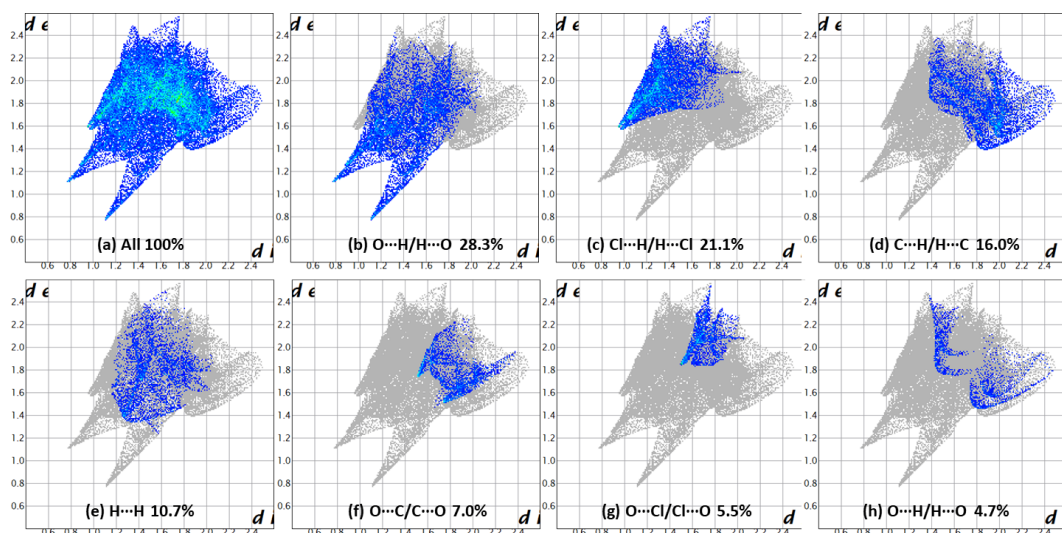

**Figure S3.** The 2D fingerprint plots of interatomic interactions for cation in **II** at 100 K show the percentages of contacts contributed to the total Hirshfeld surface area of the molecules.

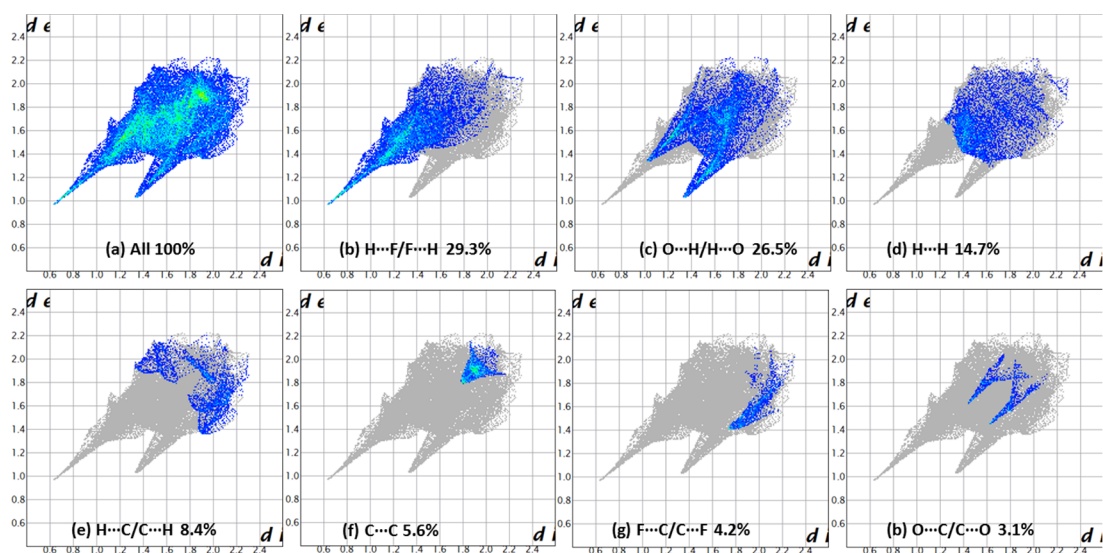

**Figure S4.** The 2D fingerprint plots of interatomic interactions for cation in **III** at 100 K showing the percentages of contacts contributed to the total Hirshfeld surface area of the molecules.

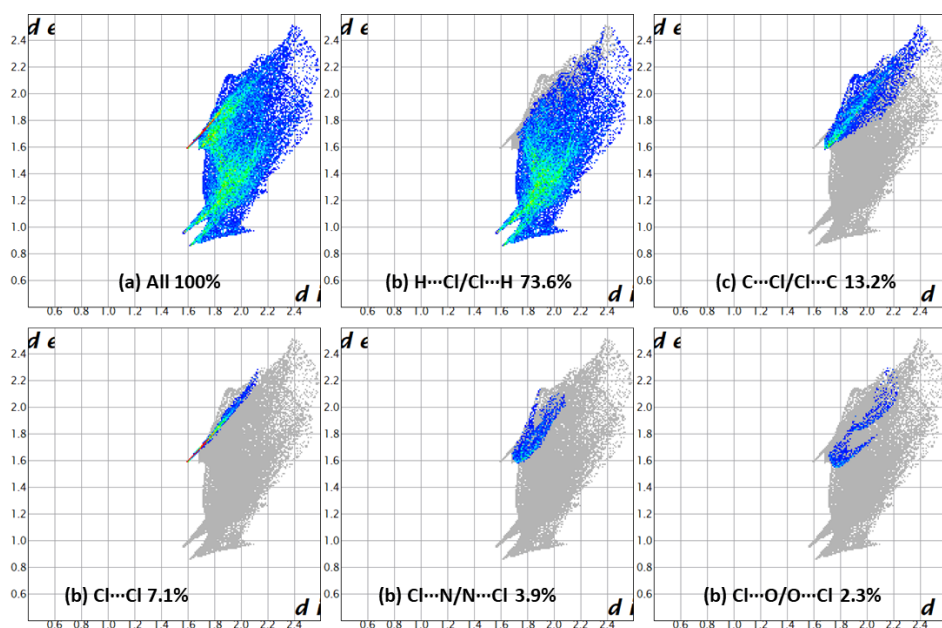

**Figure S5.** The 2D fingerprint plots of interatomic interactions for anion in **I** at 100 K show the percentages of contacts contributed to the total Hirshfeld surface area of the molecules.

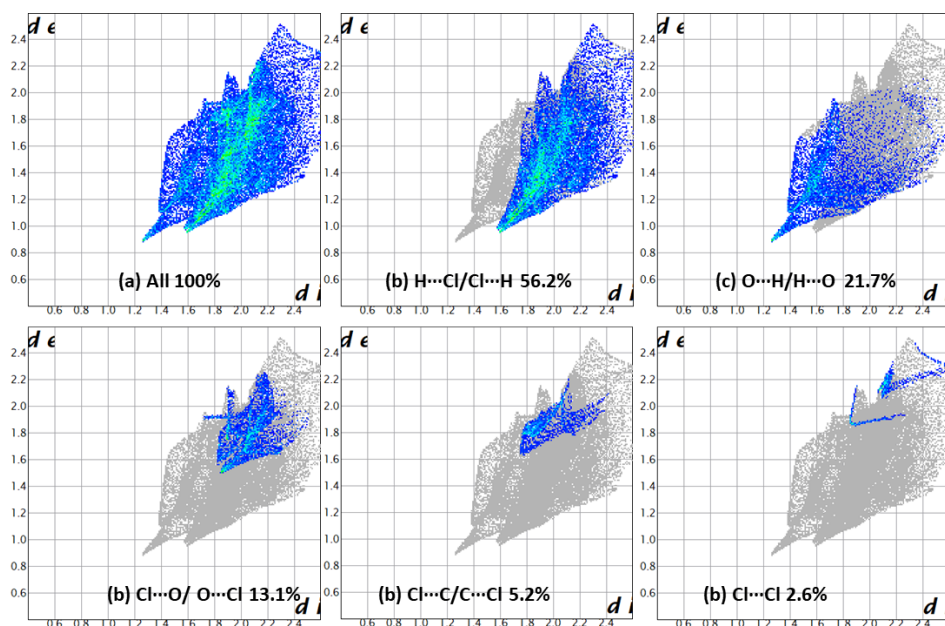

**Figure S6.** The 2D fingerprint plots of interatomic interactions for anion in **II** at 100 K show the percentages of contacts contributed to the total Hirshfeld surface area of the molecules.

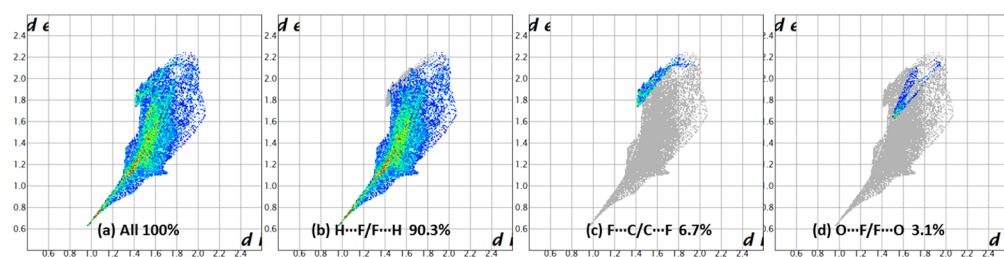

**Figure S7.** The 2D fingerprint plots of interatomic interactions for anion in **III** at 100 K showing the percentages of contacts contributed to the total Hirshfeld surface area of the molecules.
